# Supplementary material
Source: Springer Nature journal article supplement (https://www.springermedizin.de/resource/supplementary/13690_2014_5060_MOESM1_ESM.pdf/9685646)

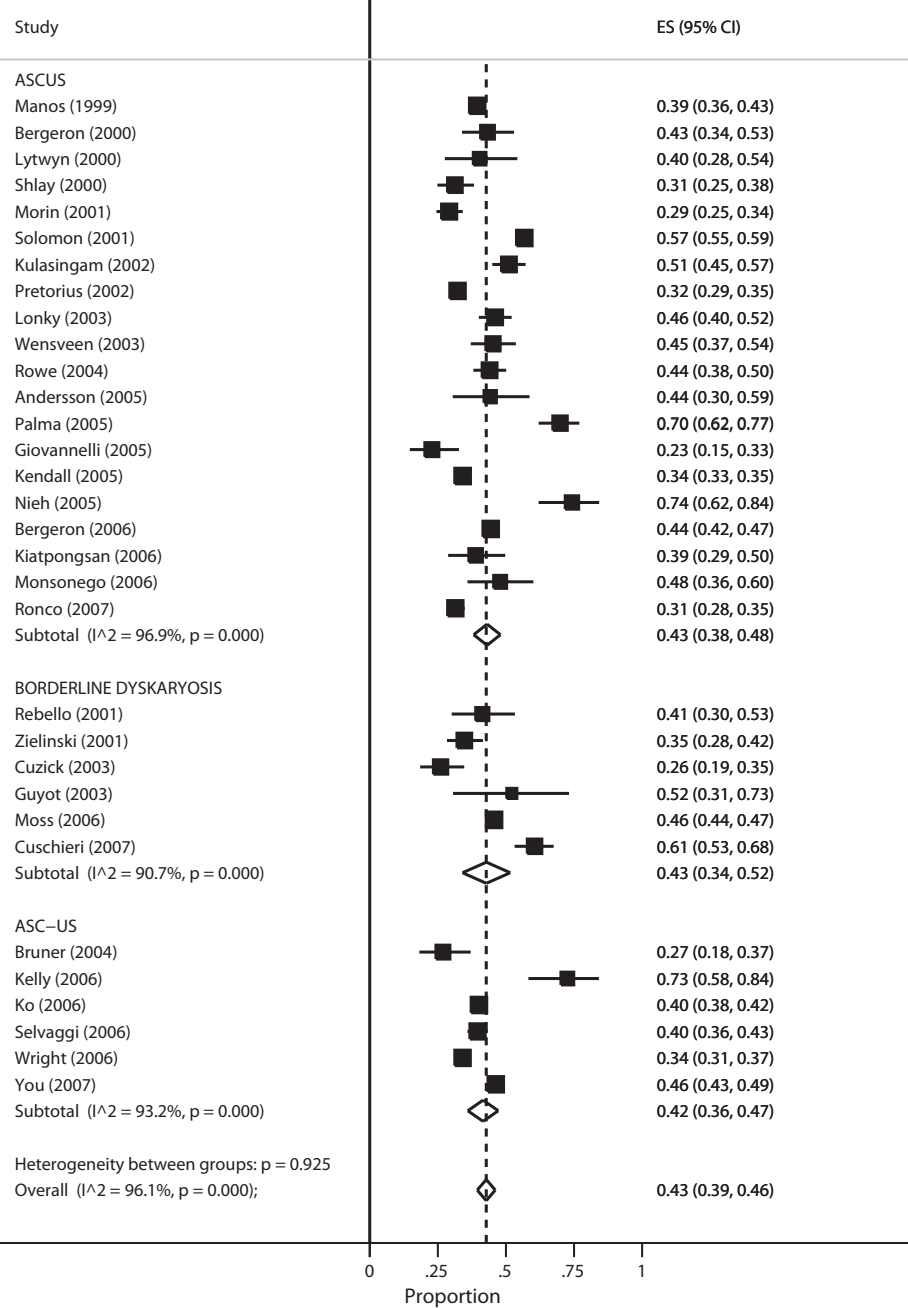

Supplement: MOESM1 [file 9685646]
